# Supplementary material
Source: Royal Society of Chemistry journal article supplement (doi:10.1039/d6fo00569a)
Supplement: d6fo00569a1.pdf [file d6fo00569a1.pdf]

## Supplementary Information

**Polyphenol combinations improve quercetin absorption and inhibit carbohydrate digestion while reducing glucose transport**

C.G.M. Dohmen\*<sub>A,B</sub>, M.M.J.P.E. Stijns<sub>A,B</sub>, R.Slotboom<sub>A,B</sub>, F.J. Troost<sub>A,B</sub>

<sup>A</sup> Department of Human Biology, NUTRIM Institute of Nutrition and Translational Research in Metabolism, Maastricht University, Maastricht, The Netherlands.

<sup>B</sup> Food Innovation and Health, Centre for Healthy Eating and Food Innovation, Maastricht University, Venlo, The Netherlands.

Additional data describing the LDH release (section 1), the inhibition of  $\alpha$ -amylase (section 2) and  $\alpha$ -glucosidase (section 3) across all tested concentrations of the individual polyphenols quercetin, isoquercetin, and kaempferol, as well as their combinations.

### 1. LDH results

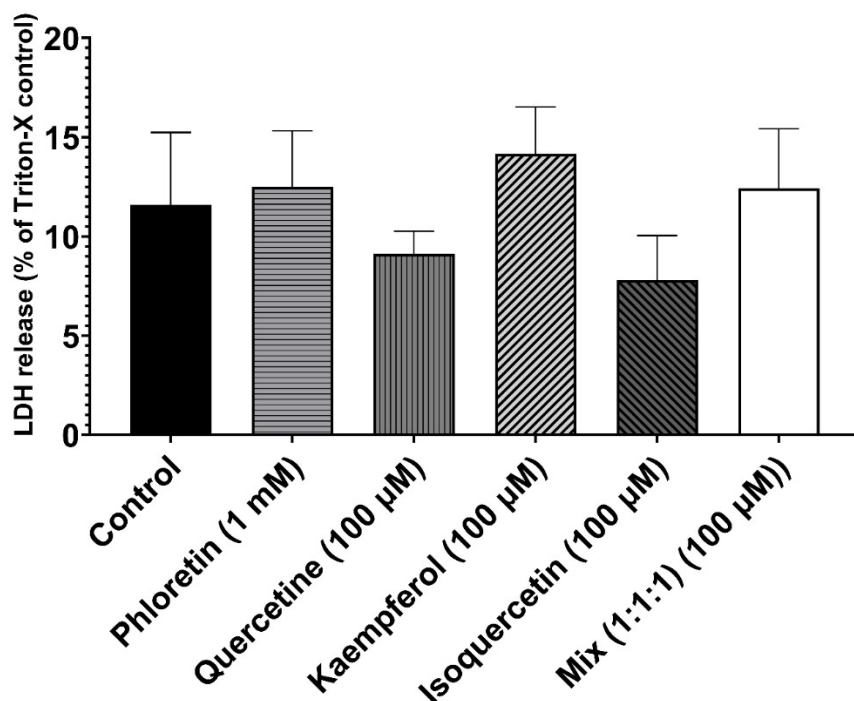

Supplementary Figure 1. Percentage LDH release compared to triton-x exposed cells, Bars show mean  $\pm$  SEM (N = 3).  $p < 0.05$  vs. control, one-way ANOVA with Dunnett's post hoc test.

## 2. Inhibition of $\alpha$ -amylase

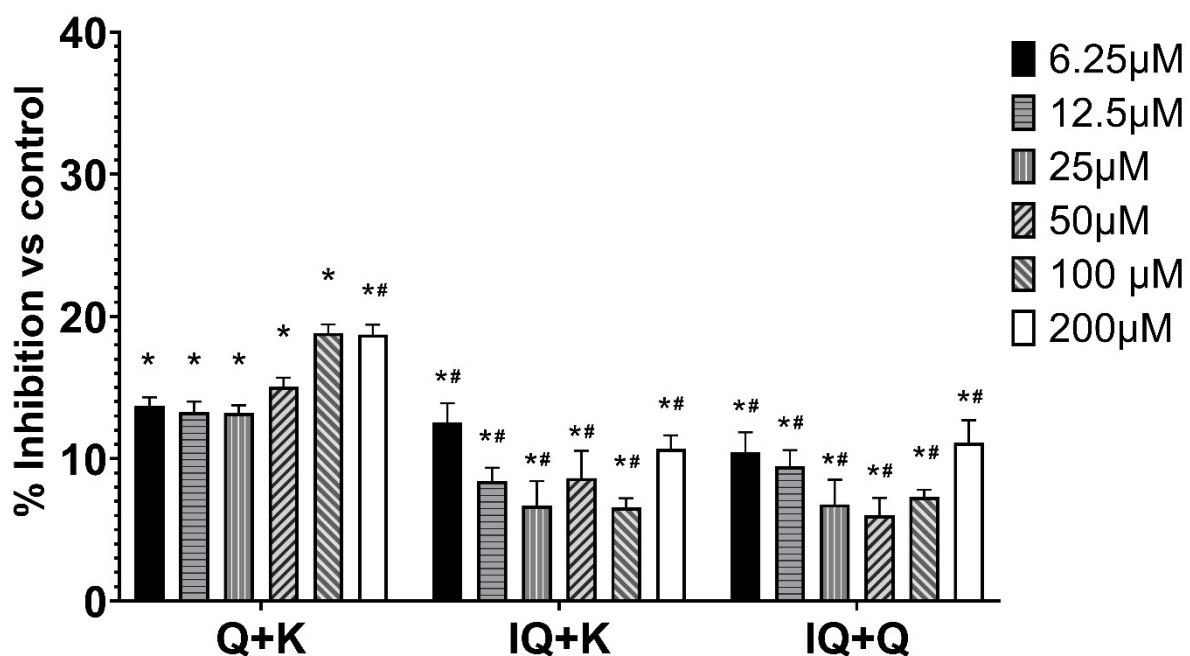

Supplementary Figure 2:  $\alpha$ -Amylase inhibition by combinations of quercetin and kaempferol (Q+K), isoquercetin and kaempferol (IQ+K), and isoquercetin and quercetin (IQ+Q). Bars show mean  $\pm$  SEM (N = 3).  $p < 0.05$  vs. control, one-way ANOVA with Dunnett's post hoc test. \* Indicates a statistically significant difference compared to the control ( $p < 0.05$ ), # indicates a statistically significant difference compared to the mixture when compared to the mixture at the same concentration.

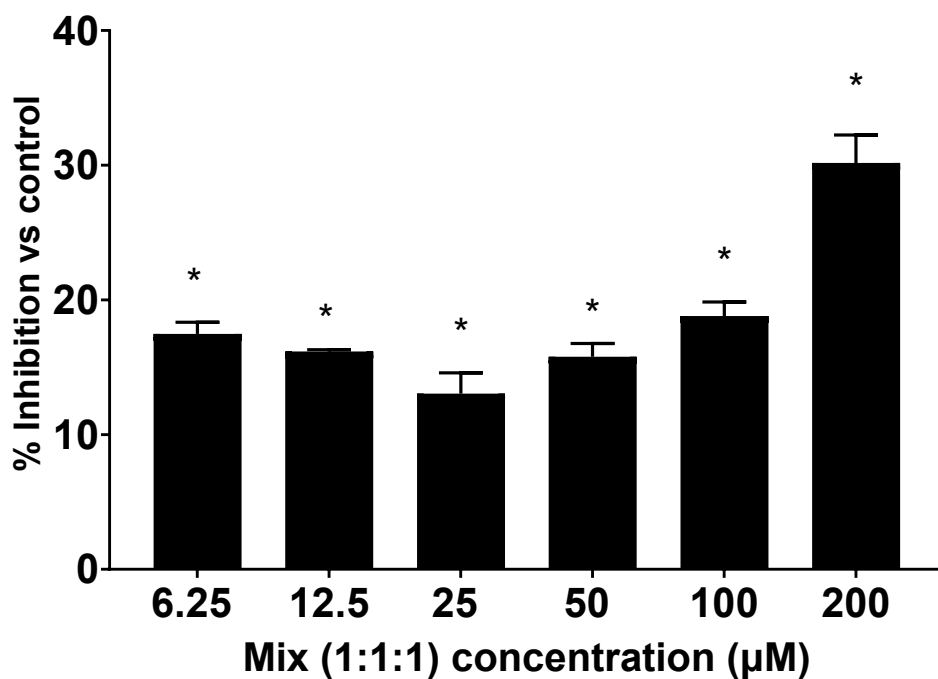

Supplementary Figure 3.  $\alpha$ -Amylase inhibition by the mixture of quercetin, kaempferol, and isoquercetin (1:1:1 ratio). Bars show mean  $\pm$  SEM ( $N = 3$ ).  $p < 0.05$  vs. control, one-way ANOVA with Dunnett's post hoc test.

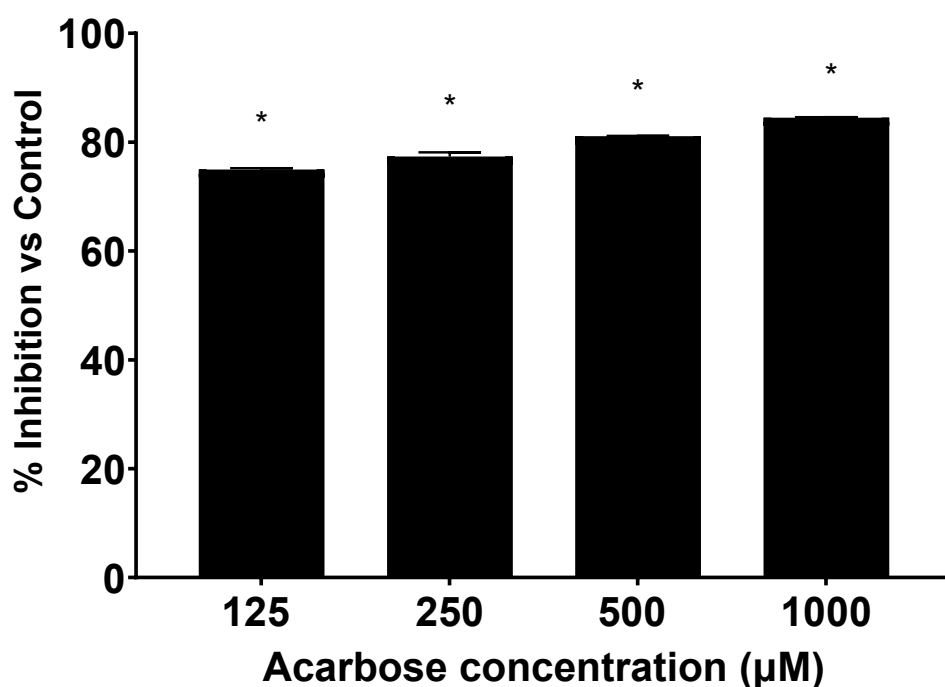

Supplementary Figure 4.  $\alpha$ -Amylase inhibition by acarbose. Bars show mean  $\pm$  SEM ( $N = 3$ ).  $p < 0.05$  vs. control, one-way ANOVA with Dunnett's post hoc test.

## 2. Inhibition of $\alpha$ -glucosidase

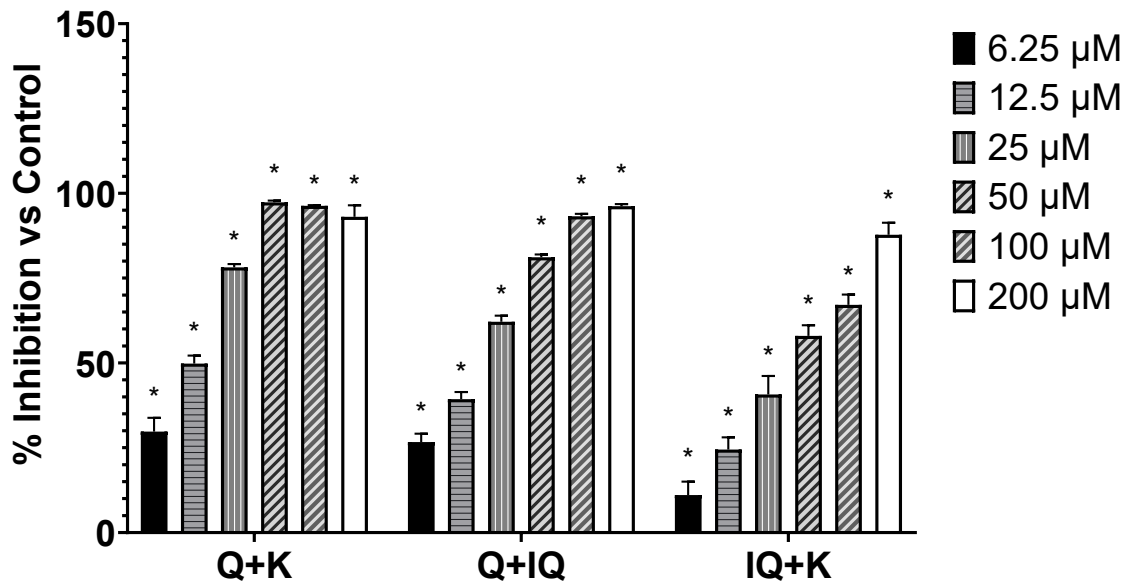

Supplementary Figure 5:  $\alpha$ -Glucosidase inhibition by combinations of quercetin and kaempferol (Q+K), isoquercetin and kaempferol (IQ+K), and isoquercetin and quercetin (IQ+Q). Bars show mean  $\pm$  SEM ( $N = 3$ ).  $p < 0.05$  vs. control, one-way ANOVA with Dunnett's post hoc test.

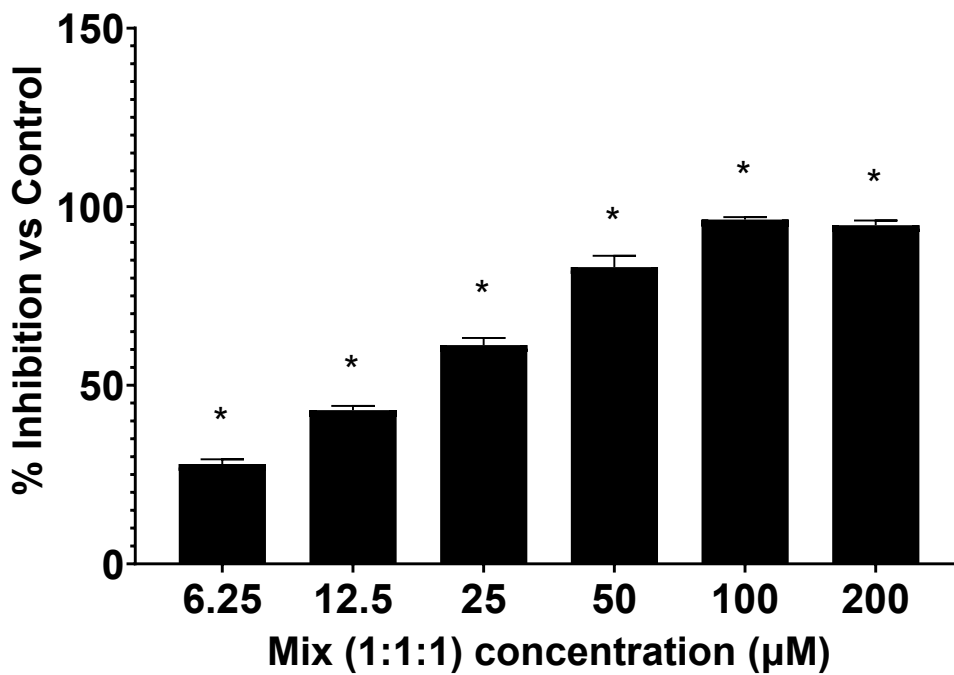

Supplementary Figure 6.  $\alpha$ -Glucosidase inhibition by the mixture of quercetin, kaempferol, and isoquercetin (1:1:1 ratio). Bars show mean  $\pm$  SEM (N = 3).  $p < 0.05$  vs. control, one-way ANOVA with Dunnett's post hoc test.

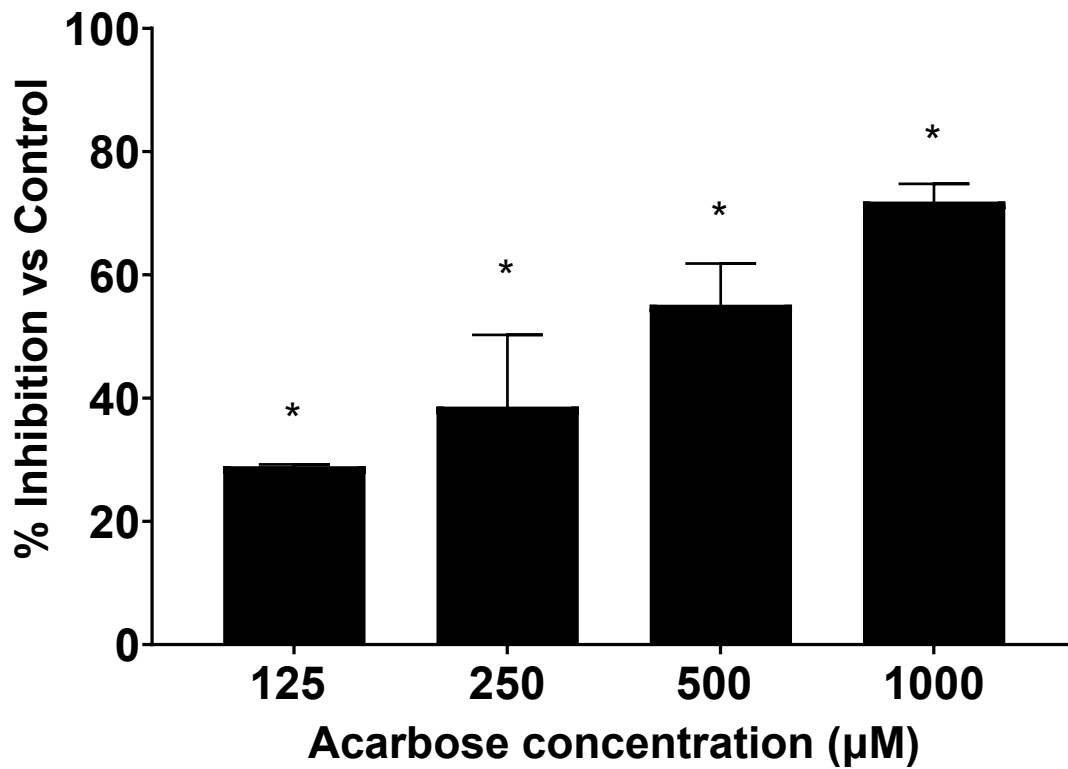

Supplementary Figure 7.  $\alpha$ -Glucosidase inhibition by acarbose. Bars show mean  $\pm$  SEM (N = 3).  $p < 0.05$  vs. control, one-way ANOVA with Dunnett's post hoc test.
